# Supplementary material
Source: publisher figshare collection journal article supplement (https://sage.figshare.com/ndownloader/files/15631451)
Supplement: Supplementary file 1 [file 15631451]

**Appendix I**

**Owner survey at study entry**

***Clinical trial: Efficacy of famciclovir for control of clinical manifestations of feline upper respiratory tract disease***

1. 1. Which of the following reasons prompted you to have your cat seen at the University of California-Davis Veterinary Medical Teaching Hospital?

Ple Please check ALL of the following that apply:

- Discharge or drainage from eye/s
- Poor response to previous treatments
- Sneezing

Frequency_______________________________________________

- Discharge or drainage from nose

Describe discharge________________________________________

- Left nostril
- Right nostril
- Both nostrils
- Difficult or noisy breathing
- Other (Please write in):_____________________________________________

2. 2. How long have these signs been present___________________________________

3. 3. How would you rate the severity of your cat’s **eye discharge** at the time of starting treatment at UCD?

MILD MODERATE SEVERE

1 2 3 4 5 6 7 8 9 10

4. How would you rate the severity of your cat’s **sneezing** at the time of starting treatment at UCD?

MILD MODERATE SEVERE

1 2 3 4 5 6 7 8 9 10

5. 5. How would you rate the severity of your cat’s **nasal discharge** at the time of starting treatment at UCD?

MILD MODERATE SEVERE

1 2 3 4 5 6 7 8 9 10

6. 6. How would you rate the severity of your cat’s **difficult or noisy breathing** at the time of starting treatment at UCD?

MILD MODERATE SEVERE

1 2 3 4 5 6 7 8 9 10

7. How would you rate your cat’s **overall health** at the time of starting treatment at UCD?

MILD MODERATE SEVERE

1 2 3 4 5 6 7 8 9 10

8. 8. Considering all signs as a total, list previous treatments and estimate the degree of improvement noted (%). Please check all that apply.

**Percentage Improvement**

- Antibiotic _____________________
- Steroid _____________________
- Antihistamine _____________________
- Other drugs (please list)

_______________________ _____________________

_______________________ _____________________

_______________________ _____________________

9. 9. What was the date of your cat’s most recent vaccination? What vaccine type was administered?

____________________________________________________________________________________________________________________________________________________________________________________________________________

10. 10. Is your cat’s FIV and FeLV status known? If yes, please provide the results.

____________________________________________________________________

**Owner survey at the end of 3 weeks of therapy**

***Clinical trial: Efficacy of famciclovir for control of clinical manifestations of feline upper respiratory tract disease***

1. Which of the following signs is your cat **currently** displaying?

- Discharge or drainage from eye/s
- Poor response to previous treatments
- Sneezing

Frequency_________________________________________________

- Discharge or drainage from nose

Type _____________________________________________________

- Left nostril
- Right nostril
- Both nostrils
- Difficult or noisy breathing
- Other (Please write in): __________________________________________

2. How would you rate the severity of your cat’s **eye discharge** since starting the test treatment?

MILD MODERATE SEVERE

1 2 3 4 5 6 7 8 9 10

3. 3. How would you rate the severity of your cat’s **sneezing** since starting the test t treatment?

MILD MODERATE SEVERE

1 2 3 4 5 6 7 8 9 10

4. How would you rate the severity of your cat’s **nasal discharge** since starting the test treatment?

MILD MODERATE SEVERE

1 2 3 4 5 6 7 8 9 10

5. 5. How would you rate the severity of your cat’s **difficult or noisy breathing** since starting the test treatment?

MILD MODERATE SEVERE

1 2 3 4 5 6 7 8 9 10

6. 6. How would you rate your cat’s **overall health** since starting the test treatment?

MILD MODERATE SEVERE

1 2 3 4 5 6 7 8 9 10

7. 7. When after **starting** treatment at UC Davis did you see the best (maximal) response? _____________days

8. How long did this maximal response last? _________________days

9. 9. Did you notice any side effects that you thought might have been due to the test treatment? Please check ONE of the following:

- Yes
- No (go to question 10)

If Yes, please complete the following questions.

Please briefly describe the **first** side effect _______________________________________________________________________________________________________________________________________________________________________________________________________________

How soon after starting the drug did the side effect occur? ______________________

For how long did it persist? _______________________________________________

How severe would you rate this side effect?

MILD MODERATE SEVERE

1 2 3 4 5 6 7 8 9 10

Please briefly describe the **second** side effect _______________________________________________________________________________________________________________________________________________________________________________________________________________

How soon after starting the drug did the side effect occur?_______________________

For how long did it persist?_______________________________________________

How severe would you rate this side effect?

MILD MODERATE SEVERE

1 2 3 4 5 6 7 8 9 10

Please briefly describe the **second** side effect _______________________________________________________________________________________________________________________________________________________________________________________________________________

How soon after starting the drug did the side effect occur?_______________________

For how long did it persist?_______________________________________________

How severe would you rate this side effect?

MILD MODERATE SEVERE

1 2 3 4 5 6 7 8 9 10

10. Based upon your experience and knowing what you know now, if the same circumstances arose again would you be willing to have your cat undergo the same treatment?

Pl Please check ONE of the following:

- - Yes
  - No
  - Unsure

Please briefly state the reasons for your choice regardless of how you answered the question: _________________________________________________________________________________________________________________________________________________________________________________________________________________________________________________________________________________________________________________________________________________________

11. 11. How would you rate the **ease of giving the medication** for the past 3 weeks?

IMPOSSIBLE CHALLENGING REASONABLE SIMPLE

1 2 3 4 5 6 7 8 9 10

12. 12. Please provide in the space below any further comments or suggestions that you feel may be useful to owners of cats being treated for upper respiratory tract disease.

_____________________________________________________________________________________________________________________________________________________________________________________________________________________________________________________________________________________________________________________________________________________________________________________________________________________________________________________________________________________________________________________________________________________________________________________________________________________________________________________________________________________________________
